# Supplementary material
Source: PubMed Central journal article supplement (PMC4475941)
Supplement: pnas.1410631112.sapp.pdf [file pnas.1410631112.sapp.pdf]

## 1 Supporting Information:

### 3 § S1: How a Rugged Landscape Can Fail to Give a Tortoise-Hare Signal

#### 5 *S1.1. Potential causes:*

7 On a rugged landscape, fitness in a structured population will increase more  
8 slowly than an unstructured population (the Tortoise initially lags behind, before  
9 overtaking, the Hare; see Fig. 2b). That is, for populations differing in structure  
10 evolving on a rugged landscape, early evolution will produce a pattern similar to  
11 that predicted under a smooth landscape (e.g., before time point 250, the pattern  
12 in Figure 2b would be hard to distinguish from the entire trajectory of Figure 2a).  
13 While the presence of a Tortoise-Hare pattern indicates ruggedness, its absence  
14 does not necessarily imply a smooth landscape.

16 For example, in the experiment of Kryazhimskiy *et al.* (2012) (1), the unstructured  
17 population ended the experiment with higher average fitness. This pattern is  
18 consistent with a smooth landscape, but is not inconsistent with a rugged one. As  
19 the authors themselves acknowledge, had their experiment run longer, they may  
20 have observed higher fitness under lower rates of migration (i.e., a fitness  
21 crossing).

23 Even when there is abundant time for evolution to take place, it is still possible  
24 that evolution on a rugged landscape will fail to yield the Tortoise-Hare pattern.  
25 For instance, it is possible that the landscape is rugged, but peaks are of a  
26 homogeneous height. This could produce the fitness pattern shown in Figure 2a.

28 Finally, the landscape could be rugged with heterogeneous peak heights, but the  
29 ancestor could be positioned in the domain of a single peak. Consistent with this  
30 possibility, Kryazhimskiy *et al.* started their experiment with a lab-adapted strain  
31 of yeast and evolved their populations under standard laboratory conditions. If  
32 their yeast had access to only a single domain in a rugged landscape, a Tortoise-  
33 Hare pattern would not be expected. In such a case Kryazhimskiy *et al.* would be  
34 justified in claiming that the *local* topography of such a landscape was smooth  
35 (and indeed, they restrict their claim of smoothness accordingly).

#### 37 *S1.2. Investigating the influence of the initial position in the landscape:*

39 As outlined in our Methods, we introduced several deleterious mutations into our  
40 ancestor and evolved our populations under a stressful environment (in the  
41 presence of sub-lethal concentrations of the antibiotic tetracycline). Such  
42 manipulation was intended to displace our ancestral genotype from a peak, but it  
43 also may have placed it at a point where multiple domains were accessible. To  
44 address the effect of ancestor starting position, we describe additional NK  
45 simulations here. In addition to starting our ancestor at a random bit string, we

46 consider three other starting positions: (i) valley, (ii) pre-adapted, and (iii) “silver-  
47 spoon.” For the valley simulations, we performed a “hill-plunge of steepest  
48 descent,” moving downhill from a random genotype until we hit a valley genotype  
49 (a genotype from which all mutations were beneficial), which served as the  
50 ancestor. For the pre-adapted simulations, we allowed a random ancestor to  
51 evolve briefly (in an unstructured population) to produce a “pre-adapted”  
52 ancestor. For the silver-spoon simulations, all genotypes were ranked for fitness  
53 and the genotype defining the 99<sup>th</sup> fitness percentile was chosen as the ancestor.  
54

55 In the random and valley starting positions, the Tortoise-Hare pattern was  
56 observed and the Structured treatment ended at significantly higher average  
57 fitness than the Unrestricted treatment (Mann-Whitney tests,  $p < 0.001$ ; Fig. S1).  
58 However, in the pre-adapted and silver-spoon starting positions, the Tortoise-  
59 Hare pattern was not seen and fitness was indistinguishable between the  
60 treatments in the long run (Mann-Whitney test,  $p = 0.36$  and  $p = 0.57$  respectively;  
61 Fig. S1). These simulations demonstrate that the starting position of a population  
62 in a landscape will influence the statistical pattern of fitness of populations  
63 differing in structure.  
64

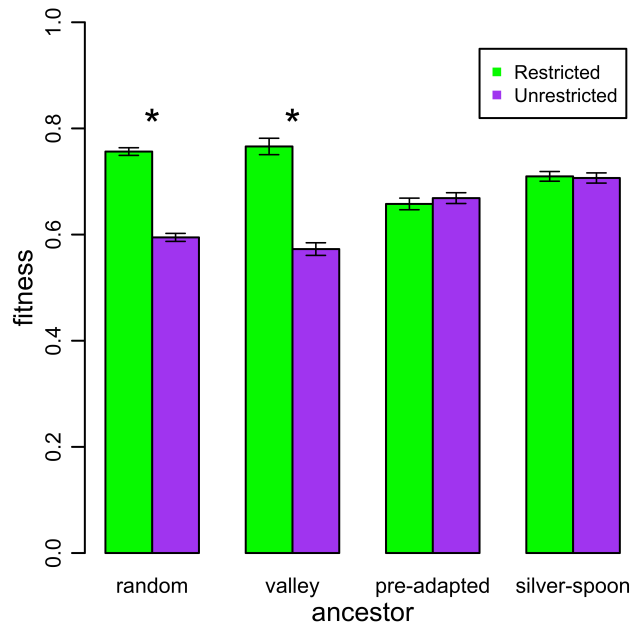

65

66

67 **Figure S1:** Metapopulations of bit strings of length  $N=15$  evolved on a rugged landscape ( $K=8$ ),  
68 where migration was either restricted or unrestricted. Average fitness in the metapopulation is  
69 shown at time point 1000 for a randomly chosen ancestor, an ancestor starting in a valley, an  
70 ancestor resulting from adaptation before the run, and an ancestor in the top percentile of fitness  
71 (the “silver-spoon” ancestor). Bars represent the mean of 40 replicates, whiskers give the  
72 standard error of the mean, and asterisks indicate significant differences.  
73

74

75

### S1.3. Additional NK simulation methods:

76

77 To study the effect of starting position in the adaptive trajectories in structured  
78 and unstructured populations, we examined starting the population with different  
79 types of ancestors. The “random” ancestor (used in the primary text) is simply a  
80 random bit string. To generate the “valley” ancestor, we start with a random bit  
81 string and substitute the worst (lowest fitness) possible mutation until no  
82 deleterious mutations are possible, and that bit string is the ancestor for the  
83 evolutionary run. To produce the “pre-adapted” ancestor, we start with a random  
84 bit string and evolve a population initialized with this bit string under unrestricted  
85 migration for 50 updates. Then bit strings are sampled from the evolved  
86 population until one is found that has a higher fitness than the starting bit string.  
87 That adapted bit string is the ancestor. To determine the “silver-spoon” ancestor,  
88 all possible bit strings ( $2^{15}$ ) are ranked according to fitness and the 99<sup>th</sup> percentile  
89 genotype is the ancestor.

90

91

## 92 **§ S2: A Simple Model to Illustrate the Tortoise-Hare Pattern**

93

94 Here we consider an extremely simple rugged landscape. There is one valley  
95 genotype (the ancestor) connected to an infinite number of peaks. Specifically,  
96 the ancestral genotype can experience any one of an infinite number of beneficial  
97 mutations where the selective benefit of a mutation is exponentially distributed.  
98 Each beneficial mutant constitutes a peak genotype from which mutation back to  
99 the ancestor (or to any other mutant) cannot occur. Once the valley genotype is  
100 extinct, no new peak genotypes will be generated.

101

102 In the evolving metapopulation, individuals were embedded within 100 demes.  
103 Each deme contained 1000 organisms. All organisms start with the ancestral  
104 (valley) genotype. The ancestor's fitness was set to 1. When an organism with  
105 the ancestral genotype experienced a mutation (rate of 0.001 per division), the  
106 new genotype had a fitness of  $1 + s$ , where  $s \sim \text{Exp}(1)$ . Selection within a deme  
107 involved the removal of a random organism, regardless of fitness, and its  
108 replacement by the birth of an organism from the same deme chosen by a  
109 fitness-weighted lottery. This death-birth process was iterated 1000 times for  
110 each deme, followed by migration between demes. For the “Limited” migration  
111 treatment, 25 random individuals from each deme were collected into a migrant  
112 pool. Then 25 random individuals from the migrant pool were added back to each  
113 deme (chosen without replacement). For the “Unlimited” migration treatment, all  
114 individuals were randomly permuted among subpopulations. There were 50  
115 replicate lines in each treatment, and each metapopulation experienced 200  
116 selection-migration episodes (updates).

117

118 In Figure S2, we see that the average fitness in these evolving metapopulations  
119 clearly demonstrates the Tortoise-Hare pattern.

120

121

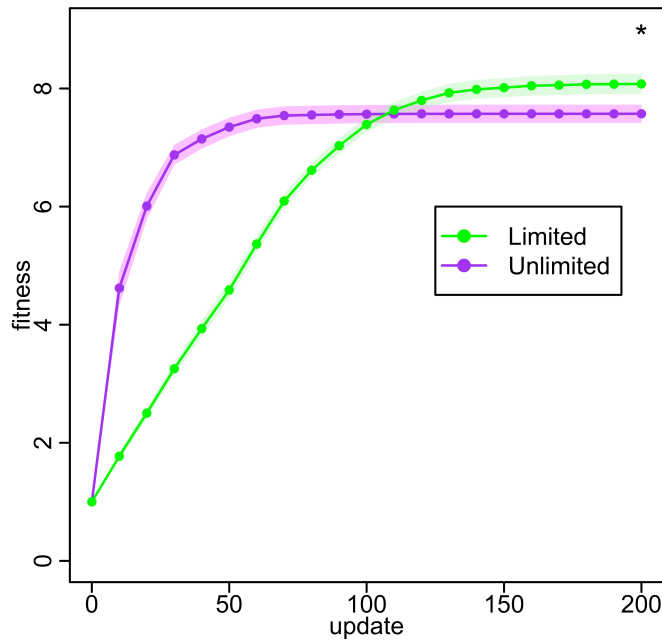

122  
123  
124  
125  
126  
127  
128

**Figure S2:** Metapopulations evolved on a simple rugged landscape, where migration was either limited or unlimited. The solid lines represent average fitness in both treatments over time, and shading gives the standard error of the mean for 50 replicate lines.

129 **§ S3: Diversity in Evolving Populations**

130  
131  
132

*S3.1. Diversity in digital and bacterial populations:*

133 A structured population performs a broader search on the adaptive landscape, as  
134 the rate of competitive displacement is lower. Consequently, the standing genetic  
135 diversity of a structured population is expected to be greater than diversity in an  
136 unstructured population. In Figure S3a, we see that this pattern does not depend  
137 on landscape ruggedness (Mann-Whitney tests,  $p < 0.01$  for  $K=0$  and  $K=8$ ). Thus,  
138 despite landscape topography, we predict to find higher genetic diversity in a  
139 structured population, and this is what we find in our bacterial metapopulations  
140 (Mann-Whitney test,  $p=0.015$ ; Fig. S3b).

141  
142  
143

*S3.2. Diversity methods:*

144  
145  
146  
147

Consider a sample of  $G$  genotypes (bit strings or nucleotide sequences). We use the diversity index of Nei and Li (1979) (2):

148  
149

$$\pi = \frac{2}{G^2} \sum_{i=2}^G \sum_{j=1}^{i-1} \pi_{ij},$$

150 where  $\pi_{ij}$  is average number of differences (in bits or bases) per site between  
151 genotype  $i$  and genotype  $j$ . We refer to  $\pi$  as bit diversity (in the NK model) or  
152 nucleotide diversity (for our bacterial system).  
153

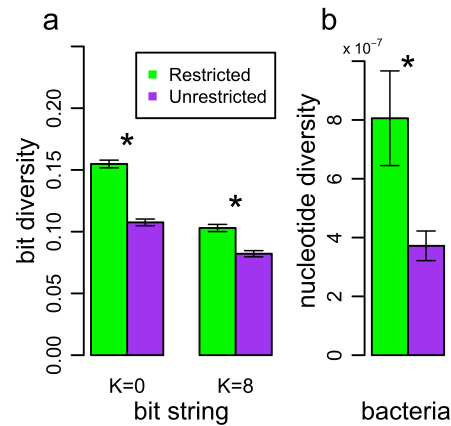

154  
155  
156 **Figure S3:** Genetic diversity in the digital and bacterial populations. (a) Average bit diversity of a  
157 sample of eight evolved bit strings from time point 1000 in the NK model simulations. Whether the  
158 landscape is smooth (K=0) or rugged (K=8), diversity is significantly greater in the Restricted  
159 treatment than the Unrestricted treatment. Bars represent the mean of 40 replicates. (b) Average  
160 nucleotide diversity within bacterial metapopulations at the final transfer of the experiment (T=36).  
161 For each metapopulation, full genome sequences from each of five isolates was used to compute  
162 the diversity index. Nucleotide diversity is significantly greater in the Restricted treatment than the  
163 Unrestricted treatment. Bars represent the mean of 5 replicates. In both parts of the figure,  
164 whiskers give the standard error and asterisks indicate significant differences.  
165  
166

### 167 S3.3. Violation of strong-selection-weak-mutation (SSWM) assumptions

168  
169 The relatively high degree of diversity in the evolving bacterial populations  
170 demonstrates a violation of strict SSWM assumptions. Isolates from the same  
171 metapopulation (in both treatments) were often not single mutant neighbors (see  
172 Figure 5 and Supplemental Table 1); thus, the diversity does not simply  
173 represent a mixture of the genotype fixing and the genotype being displaced in  
174 the midst of selective sweep. While divergent genotypes are expected in the  
175 structured population (Restricted Migration), they also appear in our less  
176 structured treatment (Unrestricted Migration). Most likely, the diversity results  
177 partly from the presence of small fitness differences between genotypes, such  
178 that new beneficial mutations may arise before old beneficial mutations fix  
179 (leading to a form of clonal interference). We also note that the Unrestricted  
180 treatment possessed some degree of population structure (i.e., this was not a  
181 “well-mixed” population), which could also contribute to diversity. Such diversity  
182 may enable metapopulations in the Unrestricted treatment to explore multiple  
183 domains simultaneously. However, the main effects of structure outlined in this  
184 paper still apply. If the landscape is multi-peaked, metapopulations in the  
185 Restricted treatment are expected to sample a *greater number of domains* (and  
186 indeed, the Restricted metapopulations had significantly greater diversity). We

187 emphasize that the same violations of SSWM assumptions occur in the NK  
188 model (see Supplemental Figure 1 for diversity profiles), in which the same  
189 migration treatments were used, and we note that the Tortoise-Hare pattern is  
190 observed for sufficiently rugged landscapes (Figure 2). Thus, even in  
191 populations violating strict SSWM assumptions, the greater parallel search that  
192 comes with greater population structure is predicted to lead to better long-term  
193 adaptation in rugged landscapes with heterogeneity in peak height.  
194

## 195 § S4: Pilot Experiment

196

### 197 S4.1. Pilot experiment overview:

198

199 The main bacterial experiment described in the text was preceded by a pilot  
200 experiment, which differed in a few important ways. First, the bacterial ancestor  
201 was derived from a strain of *E. coli* B (REL606) by selecting for resistance to the  
202 antibiotic rifampicin. (In contrast, the ancestor in the main experiment was  
203 derived from a strain of *E. coli* K-12 by selecting for resistance to colicin E2,  
204 colicin D, and phage T6.) Second, the bacterial population in the pilot  
205 experiment was propagated as a biofilm on the surface of an agar-filled Petri  
206 dish. (In contrast, the bacterial population in the main experiment was  
207 propagated as a metapopulation distributed into the 96 wells of a microtiter  
208 plate.) Two runs of the pilot experiment were conducted, each with an  
209 independently isolated rifampicin-resistant mutant. As in the main experiment,  
210 each pilot run had two treatments differing in population structure. In the first,  
211 which we label “Static,” the biofilm is transferred by pressing the fully grown Petri  
212 dish on a replica plating platform with velveteen cloth and then pressing a fresh  
213 Petri dish on the same cloth. This transfer protocol ensures a dilution of the  
214 biofilm from the exhausted dish is deposited on the fresh dish in a way that  
215 preserves spatial relationships. In the second treatment, which we label “Mixed,”  
216 the fully grown dish was pressed multiple times on the velvet-covered platform,  
217 rotating at different random angles, before the fresh dish was pressed to acquire  
218 the spatially-mixed sample. The Static and Mixed treatments roughly map to the  
219 Restricted and Unrestricted treatments, respectively, of the main experiment.  
220

220

### 221 S4.2. Pilot protocol:

222

223 Each independently derived rifampicin-resistant ancestor was grown in 5 mL of  
224 DM1000 over 24 hours, shaking at 37°C. A 100 $\mu$ L aliquot was spread over an  
225 MG agar-filled Petri dish (without rifampicin) with glass beads to initiate each  
226 population. Because all pilot runs were conducted in triplicate, each ancestor  
227 was spread onto six Petri dishes (to initiate three Static populations and three  
228 Mixed populations). These dishes were incubated over 24 hours at 37°C. In the  
229 Static treatment, the fully grown dish was pressed lightly on a sterile velveteen  
230 cloth stretched over a replica plating tool. A fresh Petri dish was then carefully  
231 pressed onto the same cloth to obtain a spatially structured dilution of the original  
232 population. A second fresh Petri dish was also pressed onto the same cloth.

233 Both dishes were incubated over 24 hours at 37°C. The first dish was used for  
234 the next transfer, while the second dish was scraped into saline, vortexed, and a  
235 1 mL aliquot was frozen at -80°C. The Mixed treatment proceeded identically to  
236 the Static treatment, except at each transfer, the fully-grown dish was (1) pressed  
237 lightly on the velvet, (2) turned clockwise at a random angle and pressed a  
238 second time, (3) turned counter-clockwise at another random angle and pressed  
239 a third time, and (4) turned clockwise at another random angle and pressed a  
240 fourth time. The fresh dishes were then pressed on the velvet to initiate the  
241 spatially mixed sample. Each replicate population was transferred 33 times.  
242 Four or five isolates (derived by picking random colonies after plating dilutions of  
243 the frozen population samples) were obtained for every population for transfer 9  
244 (early in the experiment) and transfer 33 (at the end of the experiment).

245

#### 246 *S4.3. Pilot Fitness Assay:*

247

248 Fitness was assayed on the surface of Petri dishes (the relevant environment for  
249 evolution). The ancestor was the common competitor for every competition, and  
250 was marked neutrally with the ability to use arabinose. The evolved isolate and  
251 marked ancestor were grown separately in 10 mL of DM1000 over 24 hours,  
252 shaking at 37°C. After growth, 100µL of each culture was spread on a separate  
253 MG Petri dish using glass beads; the dishes were incubated over 24 hours at  
254 37°C. The dish with the marked ancestor and the dish with the evolved isolate  
255 were each pressed onto the same sterile velveteen cloth on a replica platform to  
256 initiate the spatial competition. Immediately, ½ of the competition dish was  
257 scraped into 10mL of saline, vortexed, diluted and plated on TA agar plates  
258 (resulting colony counts gave the initial densities of each competitor; note the  
259 ancestor formed pink colonies while the evolved isolate formed red colonies).  
260 The competition dish containing the other (unscraped) half of the co-culture was  
261 placed at 37°C for 24 hours. After incubation, the remaining half of the co-culture  
262 was scraped into 10mL of saline, vortexed, diluted and plated on TA agar plates  
263 (resulting colony counts gave the final densities of each competitor). If  $E_t$  and  $A_t$   
264 are the densities of evolved and ancestral cells at time  $t$ , respectively, then the  
265 fitness of the evolved isolate relative to its ancestor is given by:

266

$$267 \quad w(E, A) = \frac{\log\left(\frac{E_{24}}{E_0}\right)}{\log\left(\frac{A_{24}}{A_0}\right)}.$$

268

269

#### 270 *S4.3. Pilot results:*

271

272 The results for the two strains are shown in Figure S4. Fitness in the Mixed  
273 treatment isolates is greater than the Static treatment isolates early, but the  
274 relationship is reversed late. Thus, a Tortoise-Hare pattern is observed for each  
275 strain. The differences are not significant, but we note that only three replicates  
276 of each treatment were run. These trends motivated our full experiment in which  
277 the number of replicates, the opportunity for adaptation (via compensation to, or

278 reversion of, more costly markers, and the presence of an antibiotic stress), and  
 279 the control over population structure (by using defined migration patterns within a  
 280 metapopulation) were all increased.  
 281

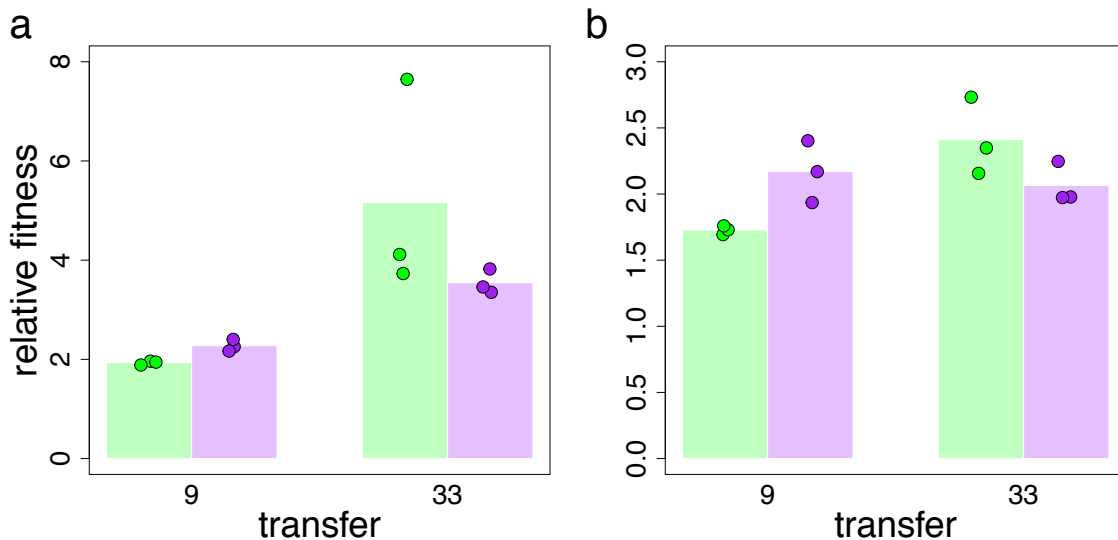

282  
 283  
 284 **Figure S4:** The results of a pilot experiment for ancestral strain *a* (part a) and ancestral strain *b*  
 285 (part b). The average fitness of four or five isolates (relative to their ancestor) from each replicate  
 286 evolving population is shown as a point, where the Static treatment is in green and the Mixed  
 287 treatment is in purple. Points are jittered for detection. The height of each bar gives the average  
 288 of the average fitnesses across the three replicates within the relevant treatment at the relevant  
 289 transfer. There are no significant differences, except for ancestral strain *a* at transfer 9  
 290 ( $p=0.02758$ , Welch's two sample t-test), but the trend for both strains is consistent with a  
 291 Tortoise-Hare pattern and motivated the full experiment described in the text.  
 292

293 **§ S5: Fitness Relative to Ancestor Predicts Fitness Relative to a New Strain**

294  
 295 Throughout this manuscript, we have measured fitness for our evolved isolates  
 296 by performing competitions against their common ancestor. How well does  
 297 fitness against this ancestral competitor predict fitness against other  
 298 competitors? If differences in fitness are primarily due to differences in growth  
 299 rate, then relative fitness against one competitor should be positively correlated  
 300 with relative fitness against another. On the other hand, if competitive outcomes  
 301 are affected by social interactions (e.g., toxic inhibition or cross-feeding), then  
 302 fitness relative to one competitor may not predict fitness relative to another (i.e., if  
 303 such social interactions change with the genotype of the competitor). To explore  
 304 the predictive power of our fitness metric, we performed additional competitions.  
 305

306 In addition to the competition with their common ancestor, each of the 50 isolates  
 307 from transfer 36 was competed against two extra strains. The first strain was an  
 308 isolate from a Restricted metapopulation at transfer 36, and the second strain  
 309 was an isolate from an Unrestricted metapopulation at transfer 36. The results of



310 these 100 competitions are shown in Figure S5. There are several things to  
311 note. First and foremost, fitness relative to the ancestor is a good predictor of  
312 fitness relative to the evolved competitors ( $R^2=0.966$  for the Restricted  
313 competitor, and  $R^2=0.965$  for the Unrestricted competitor). Second, because the  
314 linear relationship is positive, the ordering of the mean fitness across treatments  
315 (green and purple dashed lines) remains the same across competitor genotypes.  
316 Third, fitness of the strains relative to the Restricted isolate (y values in Fig S5a)  
317 is lower than fitness of the same strains relative to the Unrestricted isolate (y  
318 values in Fig. S5b). This is expected because the fitness of isolates from the  
319 Restricted treatment are generally higher than isolates from the Unrestricted  
320 treatment. Overall, these patterns are consistent with a situation in which the  
321 differences in fitness are due to differences in growth rate.  
322

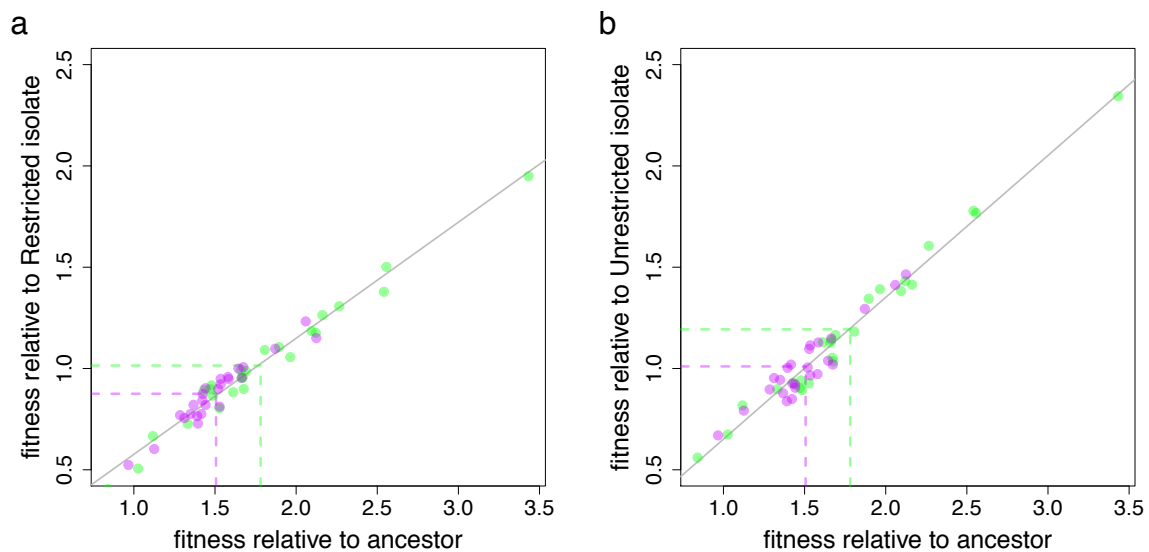

323

324 **Figure S5:** Fitness of 50 evolved isolates from transfer 36 relative to different competitors.  
325 Isolates from the Restricted treatment (the 25 green points) and isolates from the Unrestricted  
326 treatment (the 25 purple points) were competed against their common ancestor (relative fitness  
327 on the x-axis) and against another evolved isolate from the same transfer (relative fitness on the  
328 y-axis). This evolved competitor was either from the Restricted treatment (a), or from the  
329 Unrestricted treatment (b). For each experimental treatment, mean fitness values against each  
330 competitor are given by dashed lines (vertical lines, ancestral competitor; and horizontal lines,  
331 evolved competitor).

332 **Table S1:**  
333

| Migration Type | Population | Isolate | Position | Mutation Type | Change | Gene Left | Gene Right |
|----------------|------------|---------|----------|---------------|--------|-----------|------------|
| Restricted     | 1          | 2       | 1431461  | SNP           | C      | stfR      | stfR       |
| Restricted     | 1          | 2       | 4371271  | DEL           | 2      | dcuA      | aspA       |
| Restricted     | 1          | 2       | 4547236  | SNP           | C      | fimE      | fimE       |
| Restricted     | 1          | 3       | 1621052  | DEL           | 3      | marR      | marR       |
| Restricted     | 1          | 3       | 4371271  | DEL           | 2      | dcuA      | aspA       |
| Restricted     | 1          | 5       | 100788   | SNP           | G      | murC      | murC       |
| Restricted     | 1          | 5       | 987361   | SNP           | T      | ompF      | ompF       |
| Restricted     | 1          | 5       | 4371271  | DEL           | 2      | dcuA      | aspA       |
| Restricted     | 1          | 5       | 4547667  | DEL           | 1      | fimE      | fimA       |
| Restricted     | 1          | 6       | 4547156  | SNP           | T      | fimE      | fimE       |
| Restricted     | 1          | 8       | NA       | NONE          | NA     | NA        | NA         |
| Restricted     | 2          | 1       | 986920   | DEL           | 2      | ompF      | ompF       |
| Restricted     | 2          | 4       | 1197797  | SNP           | T      | icd       | icd        |
| Restricted     | 2          | 4       | 1197809  | SNP           | T      | icd       | icd        |
| Restricted     | 2          | 4       | 2611074  | SNP           | T      | hyfR      | hyfR       |
| Restricted     | 2          | 4       | 4371271  | DEL           | 2      | dcuA      | aspA       |
| Restricted     | 2          | 4       | 4611002  | INS           | G      | yjjZ      | rsmC       |
| Restricted     | 2          | 6       | NA       | NONE          | NA     | NA        | NA         |
| Restricted     | 2          | 7       | 1430874  | SNP           | G      | stfR      | stfR       |
| Restricted     | 2          | 7       | 1431302  | SNP           | T      | stfR      | stfR       |
| Restricted     | 2          | 7       | 1431530  | SNP           | T      | stfR      | stfR       |
| Restricted     | 2          | 7       | 4371271  | DEL           | 2      | dcuA      | aspA       |
| Restricted     | 2          | 8       | 1429268  | SNP           | A      | lomR      | lomR       |
| Restricted     | 2          | 8       | 1429270  | SNP           | T      | lomR      | lomR       |
| Restricted     | 2          | 8       | 1431048  | DEL           | 3      | stfR      | stfR       |
| Restricted     | 2          | 8       | 3613480  | DEL           | 16     | tatC      | tatC       |
| Restricted     | 2          | 8       | 4371271  | DEL           | 2      | dcuA      | aspA       |
| Restricted     | 3          | 1       | 987157   | SNP           | T      | ompF      | ompF       |
| Restricted     | 3          | 1       | 4371271  | DEL           | 2      | dcuA      | aspA       |
| Restricted     | 3          | 2       | 1431494  | SNP           | G      | stfR      | stfR       |
| Restricted     | 3          | 2       | 1431497  | SNP           | A      | stfR      | stfR       |
| Restricted     | 3          | 2       | 1431500  | SNP           | G      | stfR      | stfR       |
| Restricted     | 3          | 2       | 1431530  | SNP           | T      | stfR      | stfR       |
| Restricted     | 3          | 2       | 4546978  | SNP           | T      | fimE      | fimE       |
| Restricted     | 3          | 4       | 1098012  | SNP           | T      | ycdU      | ycdW       |
| Restricted     | 3          | 6       | 4477340  | SNP           | T      | pyrL      | yjgH       |
| Restricted     | 4          | 1       | 4371271  | DEL           | 2      | dcuA      | aspA       |
| Restricted     | 4          | 2       | 1413888  | SNP           | A      | intR      | intR       |

|              |   |   |         |      |       |      |      |
|--------------|---|---|---------|------|-------|------|------|
| Restricted   | 4 | 2 | 1430581 | SNP  | G     | lomR | lomR |
| Restricted   | 4 | 2 | 1430639 | SNP  | T     | lomR | lomR |
| Restricted   | 4 | 2 | 1431015 | SNP  | T     | stfR | stfR |
| Restricted   | 4 | 3 | 1431138 | SNP  | A     | stfR | stfR |
| Restricted   | 4 | 3 | 1431581 | SNP  | C     | stfR | stfR |
| Restricted   | 4 | 3 | 1638633 | SNP  | G     | ynfO | ynfO |
| Restricted   | 4 | 3 | 1638637 | SUB  | 2     | ynfO | ynfO |
| Restricted   | 4 | 3 | 1638691 | SNP  | T     | ynfO | ynfO |
| Restricted   | 4 | 3 | 4371271 | DEL  | 2     | dcuA | aspA |
| Restricted   | 4 | 3 | 4547359 | SNP  | A     | fimE | fimA |
| Restricted   | 4 | 4 | 1429200 | SNP  | C     | lomR | lomR |
| Restricted   | 4 | 4 | 1430798 | SUB  | 2     | stfR | stfR |
| Restricted   | 4 | 4 | 1431356 | SNP  | T     | stfR | stfR |
| Restricted   | 4 | 4 | 1431461 | SNP  | C     | stfR | stfR |
| Restricted   | 4 | 4 | 1431494 | SNP  | G     | stfR | stfR |
| Restricted   | 4 | 4 | 1431497 | SNP  | A     | stfR | stfR |
| Restricted   | 4 | 4 | 1431581 | SNP  | C     | stfR | stfR |
| Restricted   | 4 | 4 | 4546907 | DEL  | 309   | fimE | fimE |
| Restricted   | 4 | 6 | 1383618 | SNP  | G     | ymjB | ompG |
| Restricted   | 4 | 6 | 4371271 | DEL  | 2     | dcuA | aspA |
| Restricted   | 5 | 2 | 1431356 | SNP  | T     | stfR | stfR |
| Restricted   | 5 | 4 | 1431356 | SNP  | T     | stfR | stfR |
| Restricted   | 5 | 4 | 4072544 | SNP  | T     | glgA | glgA |
| Restricted   | 5 | 4 | 4371271 | DEL  | 2     | dcuA | aspA |
| Restricted   | 5 | 5 | NA      | NONE | NA    | NA   | NA   |
| Restricted   | 5 | 6 | 455889  | SNP  | T     | tig  | clpP |
| Restricted   | 5 | 6 | 1637898 | SNP  | T     | nohA | nohA |
| Restricted   | 5 | 6 | 4371271 | DEL  | 2     | dcuA | aspA |
| Restricted   | 5 | 7 | 4523920 | DEL  | 22905 | insB | yjhU |
| Unrestricted | 1 | 3 | 4371271 | DEL  | 2     | dcuA | aspA |
| Unrestricted | 1 | 3 | 4547370 | DEL  | 1     | fimE | fimA |
| Unrestricted | 1 | 4 | 4211306 | SNP  | C     | yrdA | yjaA |
| Unrestricted | 1 | 4 | 4371271 | DEL  | 2     | dcuA | aspA |
| Unrestricted | 1 | 5 | NA      | NONE | NA    | NA   | NA   |
| Unrestricted | 1 | 6 | 4371271 | DEL  | 2     | dcuA | aspA |
| Unrestricted | 1 | 7 | 4371271 | DEL  | 2     | dcuA | aspA |
| Unrestricted | 2 | 1 | 1621223 | AMP  | 2     | marR | marR |
| Unrestricted | 2 | 1 | 4371271 | DEL  | 2     | dcuA | aspA |
| Unrestricted | 2 | 3 | 4103874 | SNP  | A     | ompR | ompR |
| Unrestricted | 2 | 3 | 4371271 | DEL  | 2     | dcuA | aspA |
| Unrestricted | 2 | 4 | 723898  | SNP  | A     | kdpD | kdpD |

|              |   |   |         |      |    |      |      |
|--------------|---|---|---------|------|----|------|------|
| Unrestricted | 2 | 6 | 723898  | SNP  | A  | kdpD | kdpD |
| Unrestricted | 2 | 7 | 723898  | SNP  | A  | kdpD | kdpD |
| Unrestricted | 2 | 7 | 4371271 | DEL  | 2  | dcuA | aspA |
| Unrestricted | 3 | 1 | 4546900 | DEL  | 1  | fimE | fimE |
| Unrestricted | 3 | 3 | 1660526 | SNP  | T  | ynfE | ynfE |
| Unrestricted | 3 | 3 | 4104699 | SNP  | T  | envZ | envZ |
| Unrestricted | 3 | 3 | 4371271 | DEL  | 2  | dcuA | aspA |
| Unrestricted | 3 | 4 | 4546900 | DEL  | 1  | fimE | fimE |
| Unrestricted | 3 | 8 | 1431015 | SNP  | T  | stfR | stfR |
| Unrestricted | 3 | 8 | 1431050 | SNP  | G  | stfR | stfR |
| Unrestricted | 3 | 8 | 1637898 | SNP  | T  | nohA | nohA |
| Unrestricted | 4 | 1 | 2865304 | SNP  | A  | rpoS | rpoS |
| Unrestricted | 4 | 4 | 1429253 | SNP  | G  | lomR | lomR |
| Unrestricted | 4 | 4 | 1431356 | SNP  | T  | stfR | stfR |
| Unrestricted | 4 | 4 | 1431530 | SNP  | T  | stfR | stfR |
| Unrestricted | 4 | 5 | 2865304 | SNP  | A  | rpoS | rpoS |
| Unrestricted | 4 | 7 | 2865304 | SNP  | A  | rpoS | rpoS |
| Unrestricted | 5 | 2 | 1430556 | SNP  | G  | lomR | lomR |
| Unrestricted | 5 | 2 | 4371271 | DEL  | 2  | dcuA | aspA |
| Unrestricted | 5 | 3 | 1430581 | SNP  | G  | lomR | lomR |
| Unrestricted | 5 | 3 | 2060392 | SNP  | G  | yeeO | yeeO |
| Unrestricted | 5 | 3 | 4371271 | DEL  | 2  | dcuA | aspA |
| Unrestricted | 5 | 5 | 4371271 | DEL  | 2  | dcuA | aspA |
| Unrestricted | 5 | 6 | 4546903 | INS  | A  | fimE | fimE |
| Unrestricted | 5 | 7 | NA      | NONE | NA | NA   | NA   |

334

335 **Table S1.** Each row denotes a mutation discovered in the evolved (transfer 36) isolates that was  
336 not present in the ancestor. The columns are as follows: Migration Type (the pattern of migration  
337 defining the treatment of the isolate), Population (the identifier for the replicate metapopulation (1-  
338 5) of the isolate), Isolate (the identifier for the mutation's isolate (1-8)), Position (the genomic  
339 location of the mutation according to *E. coli* W311 [GenBank: AP009048]), Mutation Type (Single  
340 Nucleotide Polymorphism (SNP), Deletion (DEL), Insertion (INS), Substitution (SUB) or  
341 Amplification (AMP)), Change (the length of a mutation for DEL, or AMP, or the new nucleotide  
342 state for SNP and INS), Gene Left (the nearest open reading frame prior to the mutation), Gene  
343 Right (the nearest open reading frame after the mutation). Note that if Gene Left and Gene Right  
344 are the same, the mutation falls within that gene. All SNP's were nonsynonymous when they  
345 occurred within an open reading frame. Note that a total of 8 random isolates from each  
346 metapopulation were initially sent for genome sequencing. However, the coverage for a sizeable  
347 fraction of the isolates was below 30x. The maximum number of isolates with sufficient coverage  
348 for any metapopulation was five. For metapopulations with less than five high-coverage isolates,  
349 we sent in a second round of sequencing composed of enough isolates to ensure every  
350 metapopulation would have five sequenced isolates. These additional isolates were chosen at  
351 random from the set isolates with insufficient coverage from the first round. For the second round,  
352 coverage exceeded 30x on all isolates and thus we could analyze genomes for exactly five  
353 isolates per metapopulation. For purpose of direct comparison, we restricted our analysis of mean  
354 fitness (see Figure 3) to the isolates that were fully genome sequenced.

355

356 **Full Data, Simulation Code, and Statistical Scripts are available on the Kerr**  
357 **Lab Wiki: <http://kerrlab.org/Public/RugLand>**

358

359 **Supplementary References:**

360

361 1. Kryazhimskiy S, Rice DP, Desai MM (2012) Population Subdivision and  
362 Adaptation in Asexual Populations of *Saccharomyces Cerevisiae*. *Evolution*  
363 66(6):1931–1941.

364 2. Nei M, Li WH (1979) Mathematical model for studying genetic variation in  
365 terms of restriction endonucleases. *Proc Natl Acad Sci U S A* 76(10):5269–  
366 5273.

367
